# Supplementary material for: Metal-free reductions of N-heterocycles via Lewis acid catalyzed hydrogenation
Source: Royal Society of Chemistry journal article supplement (doi:10.1039/c0cc00719f), 2010-01-01
Supplement: c0cc00719f.pdf [file c0cc00719f.pdf]

Supporting Information for:

## Metal-free Reductions of N-Heterocycles via Lewis Acid Catalyzed Hydrogenation

Stephen J. Geier, Preston A. Chase, Douglas W. Stephan\*

**General Considerations:** All substituted quinolines were purchased from Sigma-Aldrich and used without further purification.  $B(C_6F_5)_3$  purchased from Boulder Scientific and used without further purification. Toluene was dried using an Innovative Technologies drying column, degassed and stored over molecular sieves.  $H_2$  was passed through a dririte column prior to use.  $CDCl_3$  was distilled over  $CaH_2$ .

General procedure for  $B(C_6F_5)_3$ -catalyzed hydrogenations: A sealed 50 or 100 mL Schlenk bomb was charged with 100 mg of quinoline and the appropriate amount of  $B(C_6F_5)_3$ , dissolved in 5 mL of toluene. The bomb was subjected to 3 freeze-pump-thaw cycles and subsequently exposed to 1 atm of  $H_2$  at 78 K (~4 atm). The reaction was carried out over times and temperatures shown in Table 1. Following the reaction, 5 mL of ethyl acetate was added to the solution and the mixture was run through a short plug of silica, volatiles were removed *in vacuo*.

NMR data for compounds **1-4** and **6** matched that previously published: acridan (**1**);<sup>1</sup> 1,2,3,4-tetrahydro-2-phenylquinoline (**2**);<sup>2</sup> 1,2,3,4-tetrahydro-2-methylquinoline (**3**);<sup>2-4</sup> 1,2,3,4-tetrahydro-8-methylquinoline (**4**);<sup>3</sup> 1,2,3,4-tetrahydro-phenanthroline (**6**)<sup>5</sup>

1,10-phenanthroline- $B(C_6F_5)_3$  (**5**) – 1,10-phenanthroline (7 mg, 0.04 mmol) was added to  $B(C_6F_5)_3$  (20 mg, 0.039 mmol) in 2 mL of  $CH_2Cl_2$ . The solution was allowed to stir for 2 hours, pumped to dryness and washed with pentane (2x2mL). The resulting white solid was again pumped to dryness. X-Ray quality crystals were grown from a layered solution of  $CDCl_3$ /pentane. Yield: 26 mg (96%).  $C_{30}H_8BF_{15}N_2$ : C, 52.06%; H, 1.16%; N, 4.05%. Found: C, 51.78%; H, 1.19%; N, 4.23%.

$^1H$  NMR ( $CDCl_3$ )  $\delta$ : 7.77 (m, 2H), 7.84 (m, 1H), 8.09 (dd,  $^3J_{H-H}=8$  Hz,  $^4J_{H-H}=2$  Hz, 1H), 8.51 (d,  $^3J_{H-H}=9$  Hz, 1H), 8.72 (d,  $^3J_{H-H}=8$  Hz, 1H), 9.19 (q,  $^3J_{H-H}=5$  Hz, 1H);  $^{19}F$  NMR ( $CDCl_3$ )  $\delta$ : -124.9 (br s, 1F, *o*- $C_6F_5$ ), -130.1 (br s, 1F, *o*- $C_6F_5$ ), -131.5 (br s, 1F, *o*- $C_6F_5$ ), -132.5 (br s, 1F, *o*- $C_6F_5$ ), -134.9 (br s, 1F, *o*- $C_6F_5$ ), -155.8 (br s, 1F, *p*- $C_6F_5$ ), -159.0 (br s, 1F, *p*- $C_6F_5$ ), -161.7 (br s, 1F, *p*- $C_6F_5$ ), -162.2 (br s, 1F, *m*- $C_6F_5$ ), -163.0 (br s, 1F, *m*- $C_6F_5$ ), -166.0 (br s, 1F, *m*- $C_6F_5$ ), -166.3 (br s, 1F, *m*- $C_6F_5$ ), -166.8 (br s, 1F, *m*- $C_6F_5$ ), -167.7 (br s, 1F, *m*- $C_6F_5$ );  $^{11}B$  NMR ( $CDCl_3$ )  $\delta$ : -3.2;

$^{13}\text{C}$  NMR ( $\text{CDCl}_3$ ) (partial)  $\delta$ : 123.2 (dm,  $^1J_{\text{C-F}}=227$  Hz, CF), 125.9, 130.9 (dm,  $^1J_{\text{C-F}}=296$  Hz, CF), 136.5, 146.0 (dm,  $^1J_{\text{C-F}}=279$  Hz, CF), 153.2.

General procedure for hydrosilylation: a 20 mL vial was charged with acridine (or 2-phenylquinoline) and  $\sim 1.25$  equivalents of  $\text{Et}_3\text{SiH}$  in  $\text{CDCl}_3$ .  $\text{B}(\text{C}_6\text{F}_5)_3$  (5 mol %) was added and the solution was stirred. Hydrosilylation of 2-phenylquinoline reached 76% conversion after 4 hours and reached a maximum of 85% conversion to (**7**) after 48 hours.

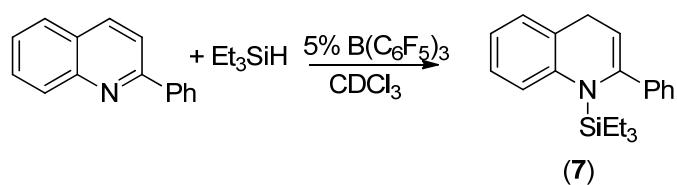

(7)  $^1\text{H}$  NMR ( $\text{CDCl}_3$ )  $\delta$ : 0.80 (m, 15H,  $\text{CH}_2\text{CH}_3$ ), 3.26 (d,  $^3J_{\text{H-H}}=5$  Hz, 2H,  $\text{CH}_2$ ), 5.33 (t,  $^3J_{\text{H-H}}=5$  Hz, 2H alkenyl- $\text{CH}$ ), 6.95 (td,  $^3J_{\text{H-H}}=6$  Hz,  $^4J_{\text{H-H}}=2$  Hz, 1H), 7.01 (d,  $^3J_{\text{H-H}}=7$  Hz, 1H), 7.09 (m, 2H), 7.24 (m, 3H), 7.45 (m, 3H), 8.14 (m, 1H).  $^{29}\text{Si}$  NMR ( $\text{CDCl}_3$ )  $\delta$ : 14.3.

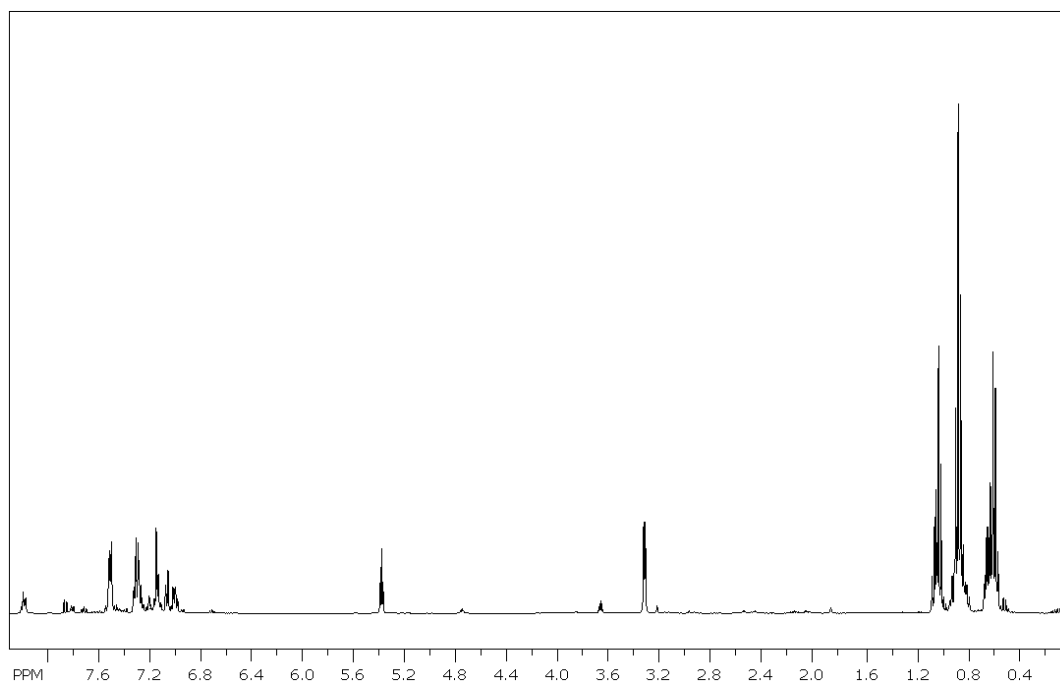

Figure 1:  $^1\text{H}$  NMR of (8) in  $\text{CDCl}_3$  after 48 hours at  $25^\circ\text{C}$  (Particularly characteristic of (7) are the resonance at 3.26 and 5.33 ppm, corresponding to the methylene and alkenyl protons, respectively).

1. P. Nandi, J. L. Dye and J. E. Jackson, *The Journal of Organic Chemistry*, 2009, **74**, 5790-5792.
2. M. R. Pitts, J. R. Harrison and C. J. Moody, *Journal of the Chemical Society, Perkin Transactions 1*, 2001, 955-977.
3. S. Murahashi, Y. Imada and Y. Hirai, *Bulletin of the Chemical Society of Japan*, 1989, **62**, 2968-2976.
4. S.-M. Lu, X.-W. Han and Y.-G. Zhou, *Journal of Organometallic Chemistry*, 2007, **692**, 3065-3069.
5. C. Bianchini, V. Dal Santo, A. Meli, S. Moneti, R. Psaro, L. Sordelli and F. Vizza, *Inorganica Chimica Acta*, 2008, **361**, 3677-3680.
